# Supplementary material for: Transfer of Cellular Content from the Allogeneic Cell-Based Cancer Vaccine DCP-001 to Host Dendritic Cells Hinges on Phosphatidylserine and Is Enhanced by CD47 Blockade
Source: MDPI journal article supplement (doi:10.3390/cells10113233), 2021-11-19
Supplement: s1 [file s1]

**Table S1. List of antibodies and multiplex kits used throughout the study**

| Antibodies                            | Source          | Catalog No. |
|---------------------------------------|-----------------|-------------|
| <b>Used as single antibodies:</b>     |                 |             |
| Anti-human CD1a FITC (HI149)          | BD Biosciences  | 555806      |
| Anti-human CD1a APC (HI149)           | BioLegend       | 300110      |
| Anti-human CD3 APC (UCHT1)            | BD Biosciences  | 555335      |
| Anti-human CD11c APC (B-ly6)          | BD Biosciences  | 559877      |
| Anti-human CD14 APC-H7 (MφP9)         | BD Biosciences  | 560180      |
| Anti-human CD14 FITC (MφP9)           | BD Biosciences  | 345784      |
| Anti-human CD14 APC-fire (63D3)       | BioLegend       | 367120      |
| Anti-human CD19 APC (HIB19)           | BD Biosciences  | 555415      |
| Anti-human CD34 PE (581)              | BD Biosciences  | 555822      |
| Anti-human CD34 PerCP-Cy5.5 (581)     | BioLegend       | 343522      |
| Anti-human CD40 FITC (5C3)            | BD Biosciences  | 555588      |
| Anti-human CD70 PE (113-16)           | BioLegend       | 355104      |
| Anti-human CD80 FITC (L307.4)         | BD Biosciences  | 557226      |
| Anti-human CD80 APC (2D10)            | BioLegend       | 305220      |
| Anti human CD80 BV510 (2D10)          | BioLegend       | 305234      |
| Anti-human CD83 PE (HB15a)            | Beckman Coulter | PNIM2218U   |
| Anti-human CD83 APC (HB15e)           | BD Biosciences  | 551073      |
| Anti-human CD83 BV421 (HB15e)         | BioLegend       | 305324      |
| Anti-human CD86 PE (FUN-1)            | BD Biosciences  | 555658      |
| Anti-human CD86 APC (FUN-1)           | BD Biosciences  | 555660      |
| Anti human CD86 PE-Cy7 (BU63)         | BioLegend       | 374210      |
| Anti-human CD209 APC (DCN46)          | BD Biosciences  | 551545      |
| Anti-human CD274 APC (MIH1)           | BD Biosciences  | 563741      |
| Anti-human CD304 APC                  | BioLegend       | 354506      |
| Anti-human HLA-ABC APC (W6/32)        | BioLegend       | 311410      |
| Anti-human HLA-DR PerCP-Cy5.5 (G46-6) | BD Biosciences  | 552764      |
| Anti-human HLA-DP/DQ/DR FITC (Bu26)   | GeneTex         | GTX43442    |
| Anti-human HLA-DP/DQ/DR APC (Tü39)    | BioLegend       | 361714      |

|                                                                                                                                                                                                                                                                                                                        |                          |                                                                 |
|------------------------------------------------------------------------------------------------------------------------------------------------------------------------------------------------------------------------------------------------------------------------------------------------------------------------|--------------------------|-----------------------------------------------------------------|
| Mouse IgG1 PE, Isotype Control (X40)                                                                                                                                                                                                                                                                                   | BD Biosciences           | 345816                                                          |
| Mouse IgG1 FITC, Isotype Control (X40)                                                                                                                                                                                                                                                                                 | BD Biosciences           | 345815                                                          |
| Mouse IgG1 APC, Isotype Control (MOPC-21)                                                                                                                                                                                                                                                                              | BD Biosciences           | 554681                                                          |
| Mouse IgG2a APC, Isotype Control (MOPC-173)                                                                                                                                                                                                                                                                            | BioLegend                | 400220                                                          |
| Mouse IgG2b FITC, Isotype Control (MPC-11)                                                                                                                                                                                                                                                                             | BD Biosciences           | 559532                                                          |
| Mouse IgG2b APC, Isotype Control (MPC-11)                                                                                                                                                                                                                                                                              | BioLegend                | 400320                                                          |
| Purified Mouse Anti-human CD36 (CB38)                                                                                                                                                                                                                                                                                  | BD Biosciences           | 555453                                                          |
| Purified Mouse Anti-human CD47 (CC2C6)                                                                                                                                                                                                                                                                                 | BioLegend                | 323102                                                          |
| Purified Mouse Anti-human CD204 (7C9C20)                                                                                                                                                                                                                                                                               | BioLegend                | 371902                                                          |
| Purified Mouse Anti-human LOX-1 (23C11)                                                                                                                                                                                                                                                                                | Hycult Biotech           | HM2138                                                          |
| Purified Rabbit Anti-human calreticulin                                                                                                                                                                                                                                                                                | Abcam                    | ab2907                                                          |
| Purified Mouse Anti-human CD91 (A2MR- $\alpha$ 2)                                                                                                                                                                                                                                                                      | BD Biosciences           | 550495                                                          |
| Purified Mouse Anti-human CD102 (ICAM-2)                                                                                                                                                                                                                                                                               | BioLegend                | 328502                                                          |
| Purified anti-human CD172a/b (SIRP $\alpha$ / $\beta$ ) (SE5A5)                                                                                                                                                                                                                                                        | BioLegend                | 323802                                                          |
| Purified Mouse Anti-human CD209 (DCN46)                                                                                                                                                                                                                                                                                | BD Biosciences           | 551186                                                          |
| Purified Mouse Anti-human CD282 (11G7)                                                                                                                                                                                                                                                                                 | BD Biosciences           | 558317                                                          |
| Purified Mouse Anti-human CD284 (HTA125)                                                                                                                                                                                                                                                                               | BioLegend                | 312802                                                          |
| Mouse IgG1, Isotype Control (P3.6.2.8.1)<br>(including Azide)                                                                                                                                                                                                                                                          | Thermo Fisher Scientific | 16-4714-82                                                      |
| <b>Targets tested by customized multiplex kits:</b>                                                                                                                                                                                                                                                                    |                          |                                                                 |
| <b>3-plex:</b> CCL5/Rantes; CXCL10, IL-8                                                                                                                                                                                                                                                                               | eBioscience              | EPX030-00000-801                                                |
| <b>8-plex:</b> IL-1 $\beta$ , CCL2; CXCL9; GM-CSF; IFN- $\gamma$ ; IL-2; IL-6; TNF- $\alpha$                                                                                                                                                                                                                           |                          | EPX080-00000-801                                                |
| <b>19-plex:</b> CCL2; CCL3; CCL4; CX3CL1; CXCL1; CXCL13; CXCL16; CXCL2; CXCL9; GM-CSF; IFN- $\gamma$ ; IL-10; IL-12/IL23p40; IL-18; IL-1 $\beta$ ; IL-2; IL-5; IL-6; TNF- $\alpha$<br><b>3-plex:</b> CCL5/Rantes; CXCL10, IL-8<br><b>3-plex:</b> TGF $\beta$ 1; TGF $\beta$ 2; TGF $\beta$ 3<br><b>1-plex:</b> IL12p70 | Bio-Techne               | LXSAHM-19<br><br>LXSAHM-3<br><br>LXSAHM-3(TGFb)<br><br>LXSAHM-1 |
